# Supplementary material for: Evaluation of spike protein antigens for SARS-CoV-2 serology
Source: bioRxiv or medRxiv preprint supplement (doi:10.1101/2021.01.27.21250382), 2021-01-29
Supplement: Supplementary file [file media-1.pdf]

1 **Supplementary material**

2 *Jagtap et al. 2021*

3

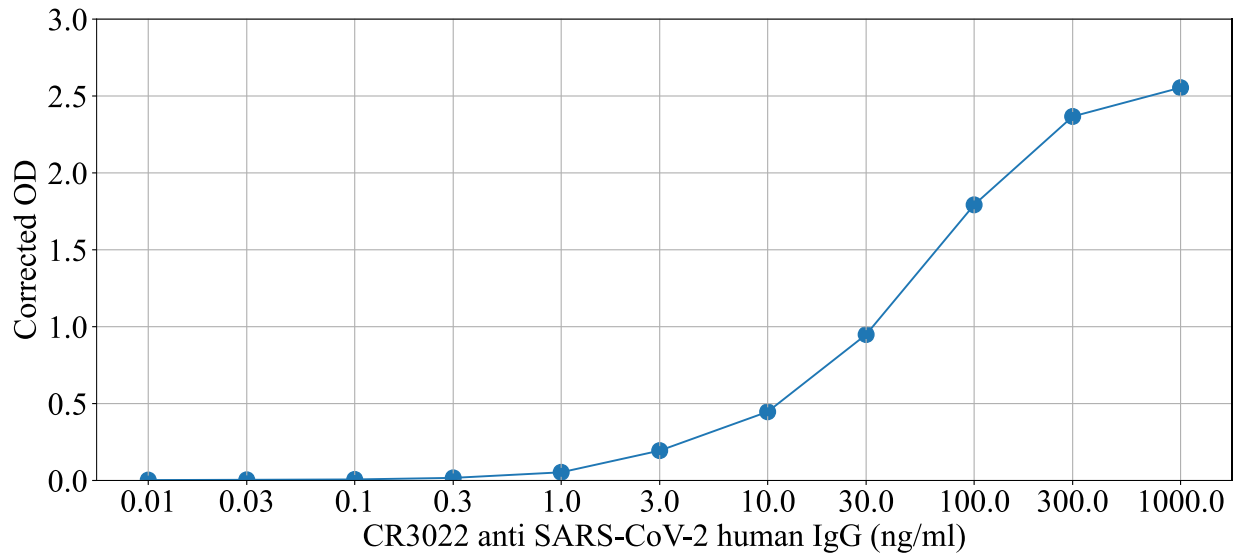

4

5 Supplementary Figure 1: Spike protein-specific antibody CR3022 binding to ST protein.

6

7

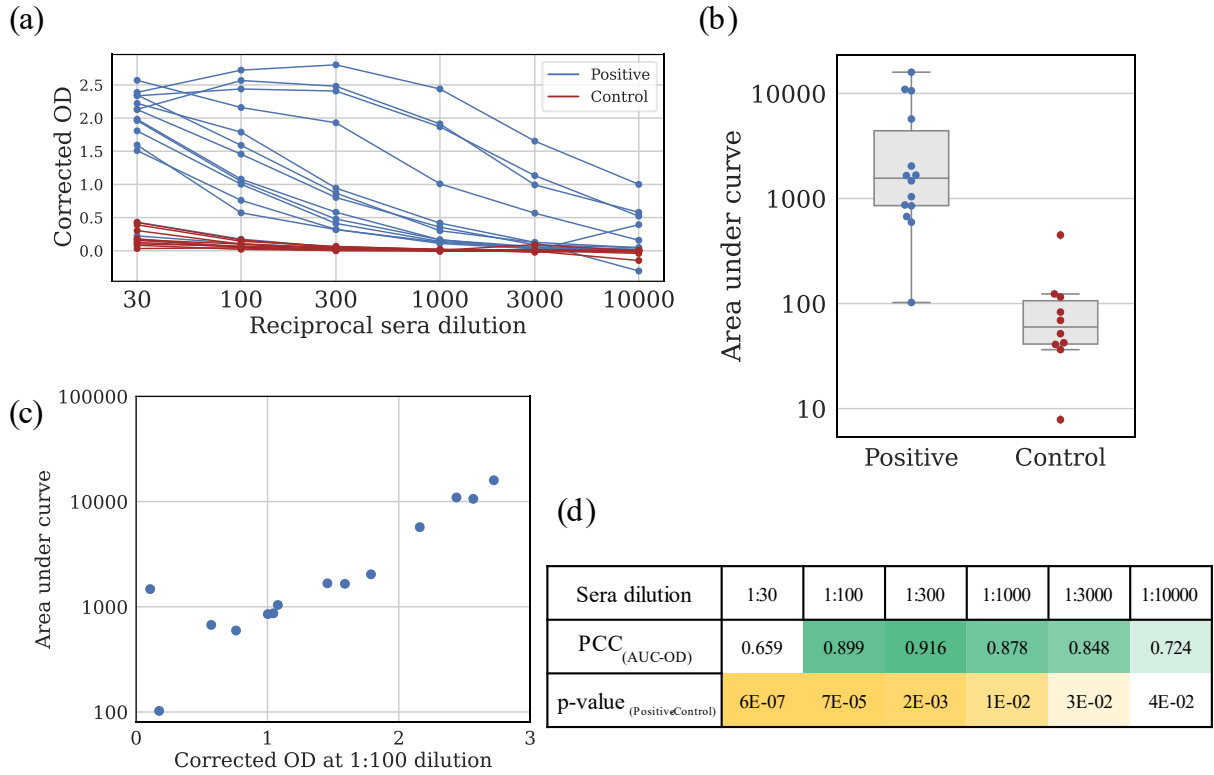

8

9 Supplementary Figure 2: Optimization of sera dilution. (a) Sera reactivity at different sera dilutions. The x-axis indicates  
 10 reciprocal dilutions of the sera. Corrected OD values at 450 nm for COVID-19 positive samples are shown in blue and  
 11 control samples in red (b) Comparison of area under the curve (AUC) for both the groups (c) Correlation between area  
 12 under the curve and corrected OD measurements at 1:100 sera dilution (d) Row 1 of the table shows Pearson's  
 13 correlation coefficient (PCC) between AUC and OD measurements at different dilutions. Row 2 indicates p-value of the  
 14 unpaired two-tailed Student's t-test between positive and control sera at different sera dilutions. Darker shades of green  
 15 represent higher PCC values, and darker yellow shades indicate more significant p-values.

16

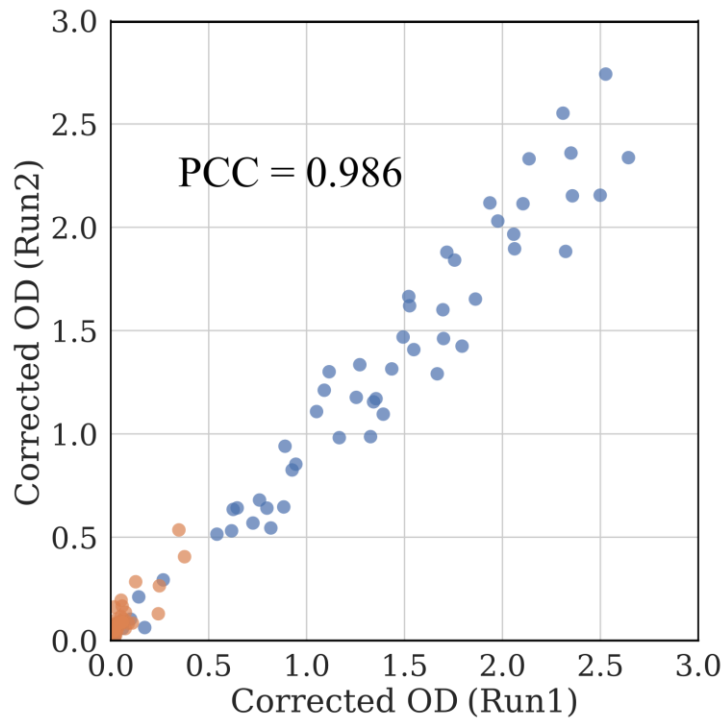

17

18 Supplementary Figure 3: Data reproducibility. Corrected OD values from two independent ST-based ELISA runs are  
19 reported (PCC = 0.986). COVID-19 positive samples (n=56) are shown in blue and control samples (n=37) are shown  
20 in orange
